# Supplementary material
Source: Springer Nature journal article supplement (https://www.springermedizin.de/resource/supplementary/12884_2012_768_MOESM2_ESM.docx/9458164)
Supplement: MOESM2 [file 9458164]

**Table 2.** Proportion of correct responses to questions regarding BMI categories and pregnancy.

| BMI category and gestational weight gain goal | Proportion of staff who ***correctly identified cut-offs*** for each BMI range (%) | Proportion of staff who ***correctly identified the proportion*** of women in each BMI category (%) | Proportion of staff who ***provided correct weight gain advice***, per BMI category (%) |
| --- | --- | --- | --- |
| **Underweight** (<18.5kg/m²:  12½ -18kg) | 7.1 | 20.2 | 3.6 |
| **Healthy weight**  (18.5-24.9kg/m²:  11½ -16kg) | 11.9 | 20.2 | 6.0 |
| **Overweight**  (25-29.9kg/m²:  7-11½kg) | 45.2 | 9.5 | 8.3 |
| **Obese**  (>30kg/m²:  5-9kg) | 50.2 | 21.4 | 7.1 |
